# Supplementary material for: Does team reflexivity impact teamwork and communication in interprofessional hospital-based healthcare teams? A systematic review and narrative synthesis
Source: PubMed Central journal article supplement (PMC7398296; doi:10.1136/bmjqs-2019-009921), 2020-01-07
Supplement: bmjqs-2019-009921supp002.pdf [file bmjqs-2019-009921supp002.pdf]

| <b>Database: Ovid MEDLINE(R) &lt;1996 to 2016&gt;</b> |                                                                                                                                                                                                         |
|-------------------------------------------------------|---------------------------------------------------------------------------------------------------------------------------------------------------------------------------------------------------------|
| Search strategy:                                      |                                                                                                                                                                                                         |
| 1                                                     | reflexiv* (3174)                                                                                                                                                                                        |
| 2                                                     | video ADJ1 feedback (247)                                                                                                                                                                               |
| 3                                                     | ethnograph* (6438)                                                                                                                                                                                      |
| 4                                                     | critical reflect* (705)                                                                                                                                                                                 |
| 5                                                     | peer assessment* (MeSH 'peer review, healthcare') (1210)                                                                                                                                                |
| 6                                                     | simulation* (MeSH 'simulation training/mt, og) (448)                                                                                                                                                    |
| 7                                                     | 1 OR 2 OR 3 OR 4 OR 5 OR 6 or 7 (11853)                                                                                                                                                                 |
| 8                                                     | hospital ADJ1 team* (213)                                                                                                                                                                               |
| 9                                                     | multi-disciplinary team* (1734)                                                                                                                                                                         |
| 10                                                    | ward* (MeSH 'health personnel/ed, og, px, st, td') (11497)                                                                                                                                              |
| 11                                                    | hospital ADJ1 unit* (7209)                                                                                                                                                                              |
| 12                                                    | hospital ADJ1 department* (16213)                                                                                                                                                                       |
| 13                                                    | hospital* (MeSH 'Hospital-patient relations/ or Medical staff, Hospital/ or Hospital-physician relations/ or Nursing staff, Hospital/ or Personnel, Hospital/ or Hospital Communication Systems (43215) |
| 14                                                    | 9 OR 10 OR 11 OR 12 OR 13 OR 14 (77664)                                                                                                                                                                 |
| 15                                                    | 8 AND 15 (585)                                                                                                                                                                                          |

| <b>Database: PsychINFO &lt;2002 to 2016&gt;</b> |                                                                                |
|-------------------------------------------------|--------------------------------------------------------------------------------|
| Search strategy:                                |                                                                                |
| 1                                               | reflexiv* (6327)                                                               |
| 2                                               | video ADJ1 feedback (356)                                                      |
| 3                                               | ethnograph* (19449)                                                            |
| 4                                               | critical reflect* (1699)                                                       |
| 5                                               | peer assessment* (MeSH 'exp Medical Education/ and exp Peer Evaluation/') (47) |
| 6                                               | simulation* (186)                                                              |
| 7                                               | 1 OR 2 OR 3 OR 4 OR 5 OR 6 OR 7 (27057)                                        |
| 8                                               | hospital ADJ1 team* (38)                                                       |
| 9                                               | multi-disciplinary team* (258)                                                 |
| 10                                              | ward* (MeSH 'exp Hospitals/') (13153)                                          |
| 11                                              | hospital ADJ1 unit* (372)                                                      |
| 12                                              | hospital ADJ1 department* (220)                                                |
| 13                                              | hospital* (MeSH medical personnel/ or health personnel/) (14480)               |
| 14                                              | 9 OR 10 OR 11 OR 12 OR 13 OR 14 (27498)                                        |
| 15                                              | 8 AND 15 (473)                                                                 |

| <b>Database: CINAHL &lt;1990 to 2016&gt;</b> |                                                                   |
|----------------------------------------------|-------------------------------------------------------------------|
| Search strategy:                             |                                                                   |
| 1                                            | reflexiv* (MeSH 'Reflexivity (Research)) (145)                    |
| 2                                            | video feedback (373)                                              |
| 3                                            | ethnograph* (MeSH 'Ethnographic Research/AE/ED/EV/MT/OG/ST') (54) |
| 4                                            | critical reflection (473)                                         |
| 5                                            | peer assessment (105)                                             |
| 6                                            | simulation training (370)                                         |
| 7                                            | 1 OR 2 OR 3 OR 4 OR 5 OR 6 OR 7 (1160)                            |
| 8                                            | hospital team* (26)                                               |
| 9                                            | multi-disciplinary team* (201)                                    |
| 10                                           | ward* (MeSH 'MH "Hospital Units") (4837)                          |
| 11                                           | hospital ADJ1 unit* (27)                                          |
| 12                                           | hospital ADJ1 department* (27)                                    |
| 13                                           | hospital* (259400)                                                |
| 14                                           | 9 OR 10 OR 11 OR 12 OR 13 OR 14 (259731)                          |
| 15                                           | 8 AND 15 (132)                                                    |

| <b>Database: Cochrane Library &lt;1990 to 2016&gt;</b> |                                         |
|--------------------------------------------------------|-----------------------------------------|
| Search strategy:                                       |                                         |
| 1                                                      | reflexive (136)                         |
| 2                                                      | video ADJ1 feedback (30)                |
| 3                                                      | ethnograph* (170)                       |
| 4                                                      | critical reflection (325)               |
| 5                                                      | peer assess* (6093)                     |
| 6                                                      | simulation (7408)                       |
| 7                                                      | 1 OR 2 OR 3 OR 4 OR 5 OR 6 OR 7 (13849) |
| 8                                                      | hospital ADJ1 team* (148)               |
| 9                                                      | multi-disciplinary team* (389)          |
| 10                                                     | hospital ward* (6482)                   |
| 11                                                     | hospital ADJ1 unit* (319)               |
| 12                                                     | hospital ADJ1 department* (244)         |
| 13                                                     | 9 OR 10 OR 11 OR 12 OR 13 (7119)        |
| 14                                                     | 8 AND 14 (636)                          |

| <b>Database: ISI Web of Science &lt;1990 to 2016&gt;</b> |                                         |
|----------------------------------------------------------|-----------------------------------------|
| Search strategy:                                         |                                         |
| 1                                                        | reflexiv* (22412)                       |
| 2                                                        | video*feedback (8723)                   |
| 3                                                        | ethnograph* (44150)                     |
| 4                                                        | critical reflect* (4603)                |
| 5                                                        | peer assessment* (1758)                 |
| 6                                                        | simulation training (2850)              |
| 7                                                        | 1 OR 2 OR 3 OR 4 OR 5 OR 6 OR 7 (74396) |
| 8                                                        | hospital team* (308)                    |
| 9                                                        | multi-disciplinary team* (5859)         |
| 10                                                       | hospital ward* (3388)                   |
| 11                                                       | hospital unit* (8072)                   |
| 12                                                       | hospital department* (6683)             |
| 13                                                       | 9 OR 10 OR 11 OR 12 OR 13 (23947)       |
| 14                                                       | 8 AND 14 (141)                          |

| <b>Database: PubMed</b> |                                                           |
|-------------------------|-----------------------------------------------------------|
| Search strategy:        |                                                           |
| 1                       | reflexiv*                                                 |
| 2                       | video feedback                                            |
| 3                       | ethnograph*                                               |
| 4                       | critical reflect*                                         |
| 5                       | peer assessment* (MeSH terms - exploded)                  |
| 6                       | patient simulation* (MeSH terms - exploded)               |
| 7                       | 1 OR 2 OR 3 OR 4 OR 5 OR 6 OR 7 (18147)                   |
| 8                       | hospital team*                                            |
| 9                       | multi-disciplinary communication* (MeSH terms - exploded) |
| 10                      | hospital ADJ1 ward*                                       |
| 11                      | hospital ADJ1 unit*                                       |
| 12                      | hospital ADJ1 department*                                 |
| 13                      | hospital (MeSH terms - exploded)                          |
| 14                      | 9 OR 10 OR 11 OR 12 OR 13 OR 14 (477734)                  |
| 15                      | 8 AND 15 (1085)                                           |
