# Supplementary material for: Does team reflexivity impact teamwork and communication in interprofessional hospital-based healthcare teams? A systematic review and narrative synthesis
Source: PubMed Central journal article supplement (PMC7398296; doi:10.1136/bmjqs-2019-009921), 2020-01-07
Supplement: bmjqs-2019-009921supp003.pdf [file bmjqs-2019-009921supp003.pdf]

## **Details of data extraction**

*This file summarises the information extracted through the data extraction forms.*

### **General Information:**

- Bibliographic details
- Publication type
- Location of research
- Quality assessment score

### **Overall study information:**

- Study aims
- Care setting
- Rationale
- Time period for study
- Inclusion criteria
- Exclusion criteria
- Sample selection
- Sample size
- Appropriateness of sample
- Data collection methods
- Role of researcher
- Data analysis methods
- Researcher bias
- Limitations
- Outcomes
- Themes
- Conclusions
- Generalisability
- Implications
- Future research

### **Reflexive component of the study:**

- Sample size undergoing reflexive component
- Aim of reflexive feedback session
- Reflexive method used
- Form of facilitation
- Main outcomes of reflexive component of method
